# Supplementary material for: Electromagnetic absorption enhancing mechanisms by modified biochar derived from Enteromorpha prolifera: a combined experimental and simulation study
Source: Royal Society of Chemistry journal article supplement (doi:10.1039/d2nr04162f), 2022-01-01
Supplement: d2nr04162f1.pdf [file d2nr04162f1.pdf]

Electromagnetic absorption enhancing mechanisms by modified biochar derived from  
*Enteromorpha prolifera*: A combined experimental and simulation study

Zhiwang Hao<sup>a, 1</sup>, Jimei Liu<sup>a, 1</sup>, Xinliang He<sup>a</sup>, Yubo Meng<sup>a</sup>, Xiaobin Wang<sup>a</sup>, Dong  
Liu<sup>a,\*</sup>, Naitao Yang<sup>a</sup>, Wenjie Hou<sup>b,\*</sup>, Chao Bian<sup>a,\*</sup>

<sup>a</sup>*School of Chemistry and Chemical Engineering, Shandong University of Technology,  
Zibo, 255049, China*

<sup>b</sup>*School of Computer Science and Technology, Northwestern Polytechnical University,  
Xi'an, 710129, China*

\*Corresponding author. E-mail: liu\_dong@sdut.edu.cn; wenjiehou@buaa.edu.cn;  
Bianchao@sdut.edu.cn

<sup>1</sup> Contributed equally to this work.

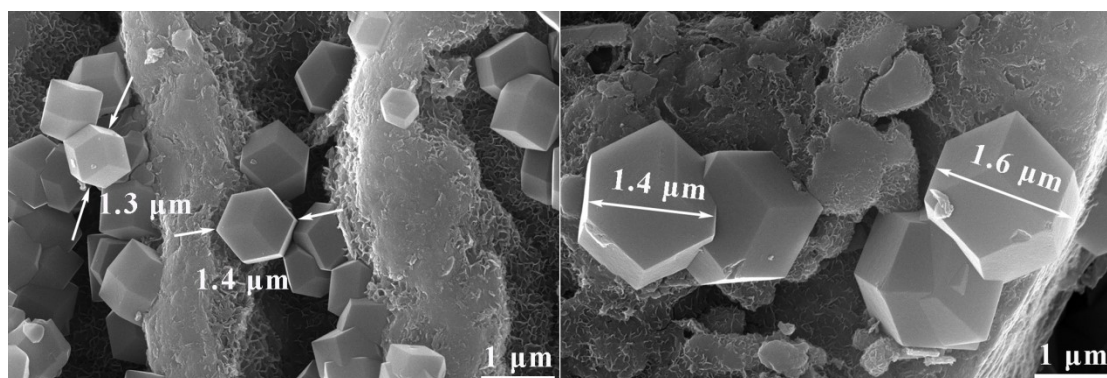

**Fig. S1** SEM images showing the average size of Fe-ZIF

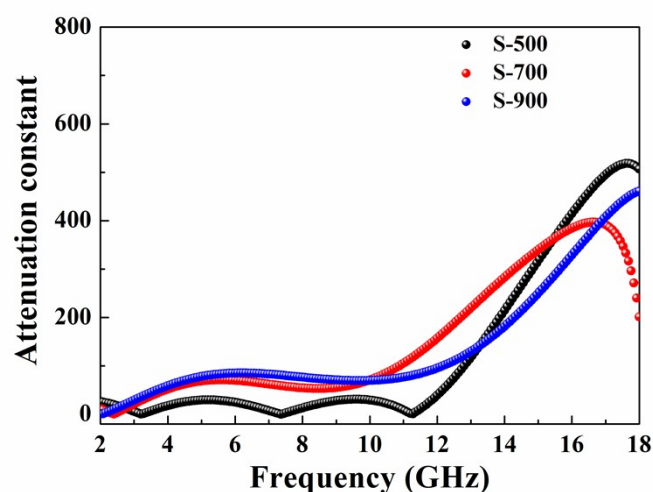

**Fig. S2** Attenuation constant of S-500, S-700 and S-900 composites.
